# Supplementary material for: Rapid generation and selection of Cas9-engineering TRP53 R172P mice that do not have off-target effects
Source: BMC Biotechnol. 2019 Nov 8;19:74. doi: 10.1186/s12896-019-0573-z (PMC6839086; doi:10.1186/s12896-019-0573-z)
Supplement: Supplementary file 5 — Additional file 5: Table S1. Summary of the analysis of the potential off-target loci. The top 10 potential off-target loci are PCR amplified and subsequently subjected to Sanger sequencing and aligned with mouse genome. Although no off-target effects of #2–10 loci are found on all the 4 mice, the off-target effects of #1 locus are detected in KI1 and KI3 mice. [file 12896_2019_573_MOESM5_ESM.xlsx]

## Sheet: Sheet1
	Chr	Score	Accession#	genomic locus	match	length	identification	Symbol	WT	KI-1	KI-2	KI-3
	11	40.1	NC_000077.6	69588520 to 69588539	1 to 20	20	1	Trp53
1	17	32.2	NC_000083.6	54420188 to 54420207	1 to 20	20	95%(19/20 )	Trp53-ps	no mutation	off-target	no mutation	off-target
2	6	30.2	NC_000072.6	18171683 to 18171697	3 to 17	15	1	Cftr	no mutation	no mutation	no mutation	no mutation
3	3	28.2	NC_000069.6	52927839 to 52927852	1 to 14	14	1	Gm20750	no mutation	no mutation	no mutation	no mutation
4	4	28.2	NC_000070.6	59319453 to 59319466	3 to 16	14	1	Susd1	no mutation	no mutation	no mutation	no mutation
5	5	28.2	NC_000071.6	24377289 to 24377302	3 to 16	14	1	Nos3	no mutation	no mutation	no mutation	no mutation
6	8	28.2	NC_000074.6	112418763 to 112418776	6 to 19	14	1	taxon	no mutation	no mutation	no mutation	no mutation
7	15	28.2	NC_000081.6	80454701 to 80454714	3 to 16	14	1	Enthd1	no mutation	no mutation	no mutation	no mutation
8	18	28.2	NC_000084.6	77176246 to 77176263	1 to 18	18	94.44%(17/18)	taxon	no mutation	no mutation	no mutation	no mutation
9	19	28.2	NC_000085.6	55069272 to 55069285	5 to 18	14	1	Gpam	no mutation	no mutation	no mutation	no mutation
10	2	28.2	NC_000068.7	77596259 to 77596272	1 to 14	14	1	Zfp385b	no mutation	no mutation	no mutation	no mutation
